# Supplementary material for: Nanoscale phase separation in laponite–polypyrrole nanocomposites. Application to electrodes for energy storage
Source: Royal Society of Chemistry journal article supplement (doi:10.1039/c4ra16540c), 2015-01-01

## Electronic Supplementary Information - ESI

### **Nanoscale Phase Separation in Laponite/Polypyrrole Nanocomposites. Application to Electrodes for Energy Storage**

*Mohamed Fatnassi and Mohammed Es-Souni\**

\* \* \*

#### **Contents**

**ESI 1. Film mass determination from SEM micrograph**

**ESI 2. STEM micrograph of Laponite particles and SEM Micrograph using Energy selective Backscattered electron (*EsB*) detector of nanocomposite film**

**ESI 3. AFM images of Lp-PPy-10% nanocomposite film**

**ESI 4. CVs at 50mV scan rates in a potential window of 0.9 V and the charge-discharge curves at 3Ag<sup>-1</sup> of Lp-PPy nanocomposite electrodes**

**ESI 5. Long-term cycling test (500 cycles) at a current density of 5 A/g for**

**Figure ESI 1. Film mass determination from SEM micrograph: a) SEM image using Energy selective Backscattered (*EsB*) detector. Image was thresholded by ImageJ software to create binary images, polymer (red) and Laponite rich-areas (white). b) Surface analysis.**

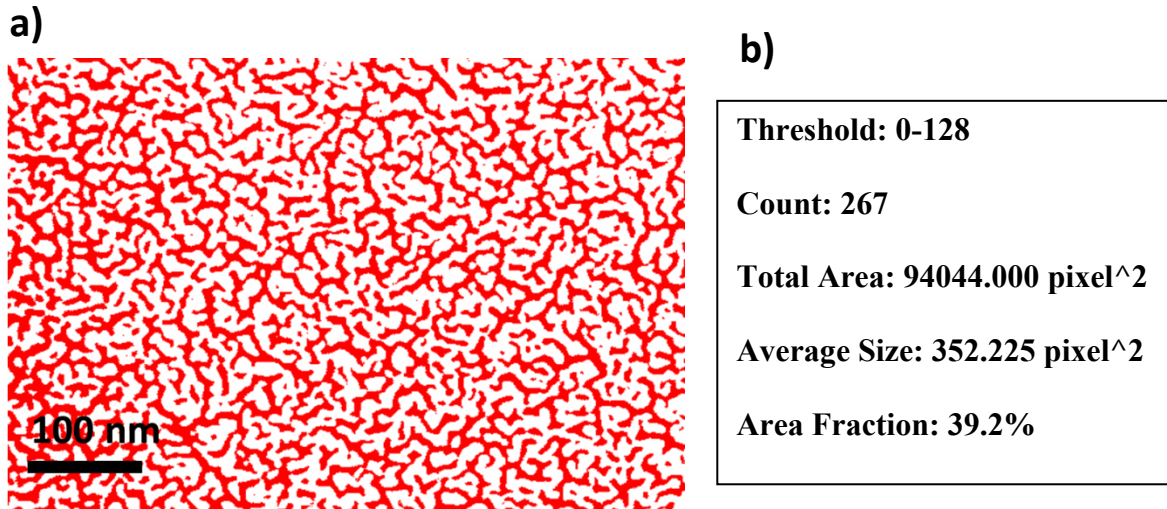

If we assume a uniform film, the film mass can be calculated according to the following equation:

$$m = S * t * \{ \phi * \rho_{Polyrrole} + (1 - \phi) * \rho_{Laponite} \}$$

where  $S$  and  $t$  were the area and the thickness,  $\phi$  the final volume fraction of polypyrrole inside the film, and  $\rho$  is the density. Density's values are: 1.54 g cm<sup>-3</sup> for polypyrrole<sup>[1]</sup> and 2.54 gcm<sup>-3</sup> for Laponite.

[1]Aldissi M (ed) (1992) Intrinsically conducting polymers: an emerging technology. Kluwer Academic Publishers, Dordrecht

**Figure ESI 2** (a) STEM micrograph obtained on thin film areas prepared on a Ni-TEM grid. Notice the T-type bonding between the laponite particles, e.g. readily visible in the center of the micrograph. Micrograph using Energy selective Backscattered (*EsB*) detector of Lp-PPy-10% nanocomposite film: (b) Top view; (c) Cross section;

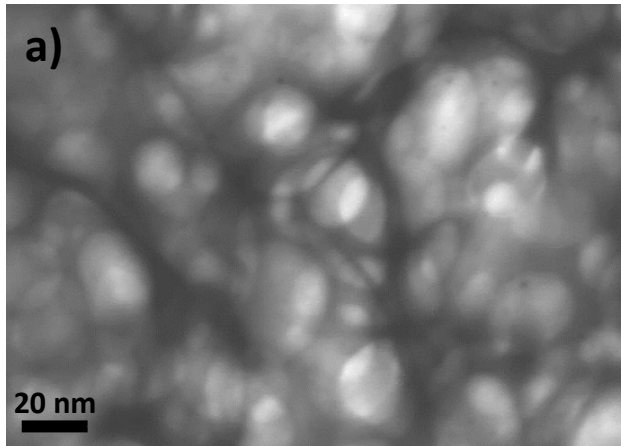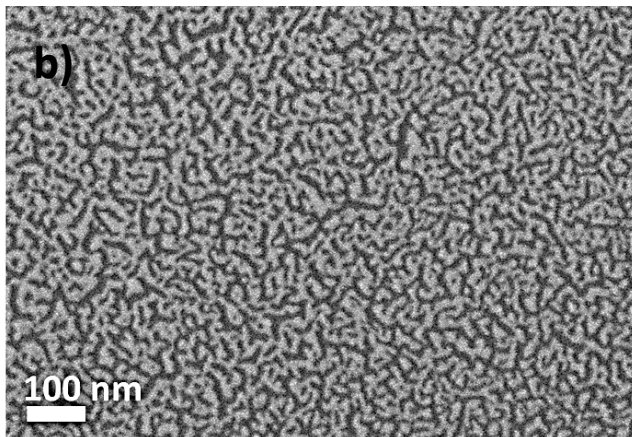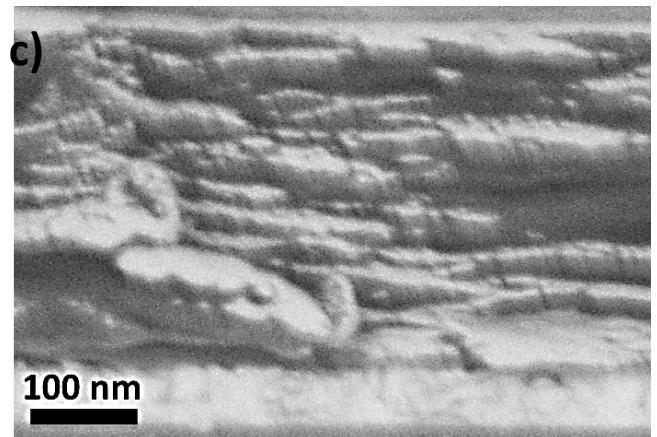

**Figure ESI 3. AFM images of Lp-PPy-10% nanocomposite film using the force modulation modus: (a) height, and (b) amplitude and (c) phase. All scans are  $1 \times 1 \mu\text{m}^2$ . Notice the meandering polymer phase (dark areas in b and c).**

**(a)**

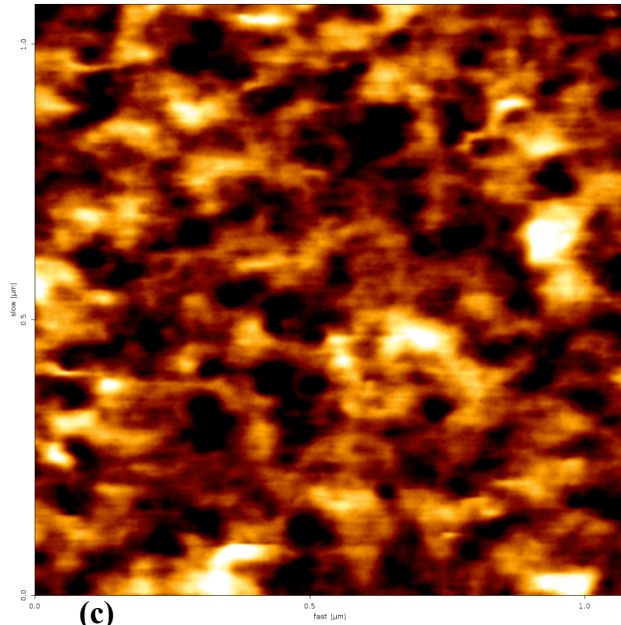

**(b)**

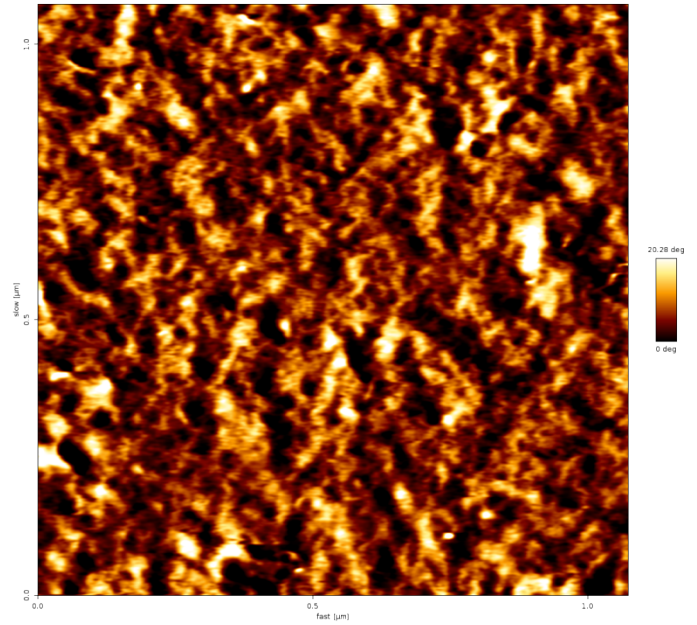

**(c)**

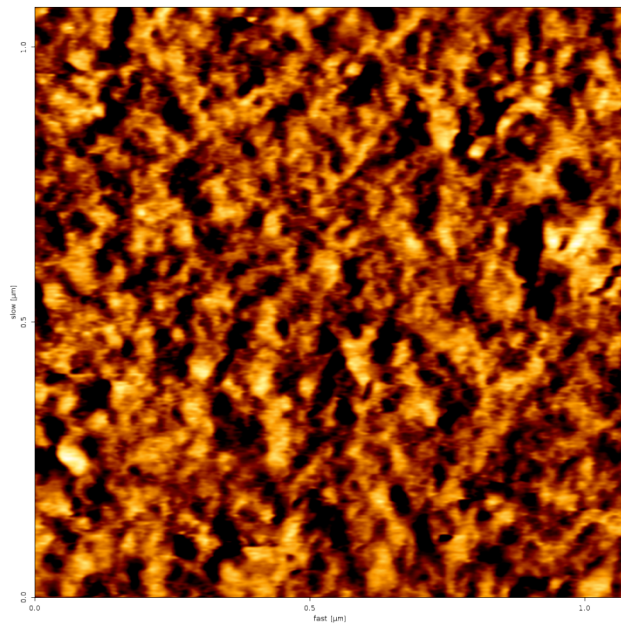

Figure ESI 4. (a) CVs of Lp-PPy nanocomposite electrodes at 50mV scan rate; (b) The charge–discharge curves at 3Ag<sup>-1</sup>.

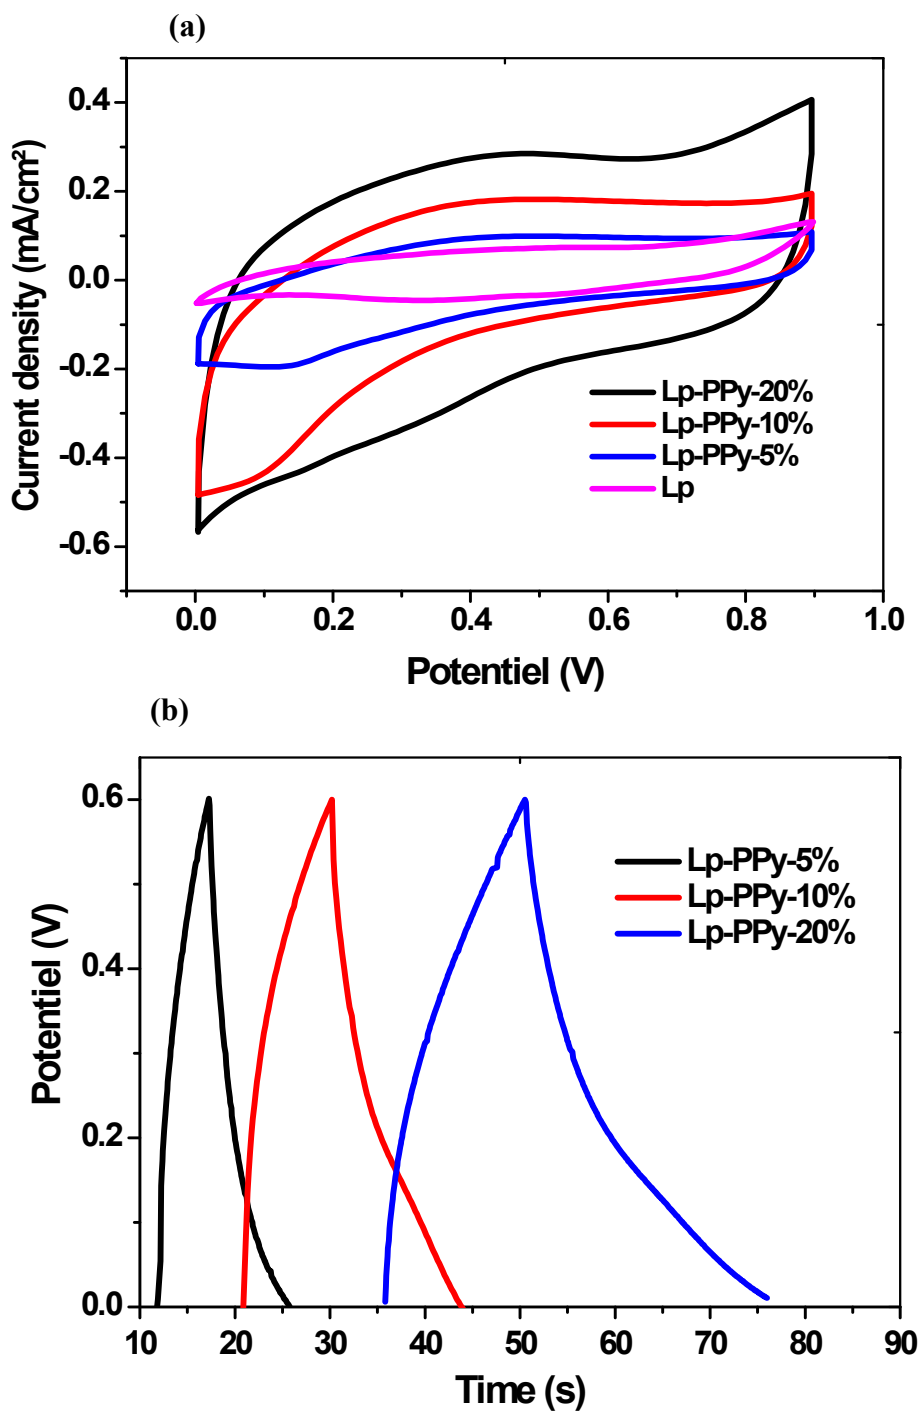

**Figure ESI 5. Long-term cycling test (500 cycles) at a current density of 5 A/g for: (a) Lp film and (b) Lp-PPy-10% nanocomposite film.**

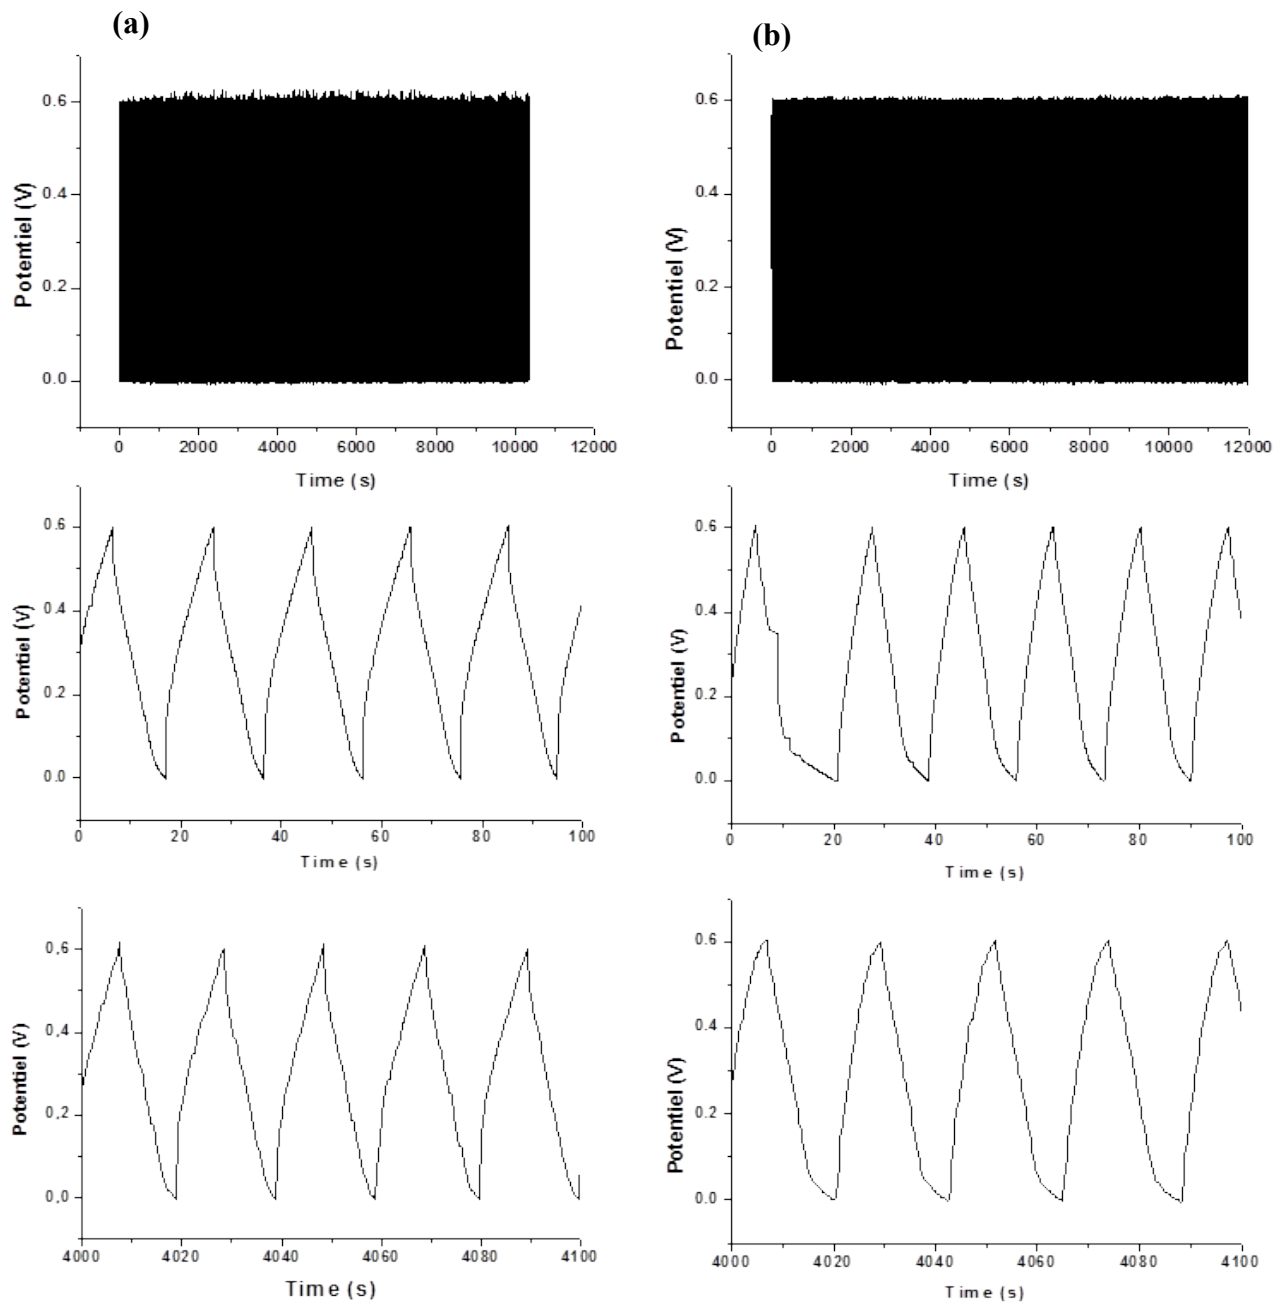

Supplement: c4ra16540c1.pdf [file c4ra16540c1.pdf]
